# Supplementary material for: Clinical validation of colorimetric RT-LAMP, a fast, highly sensitive and specific COVID-19 molecular diagnostic tool that is robust to detect SARS-CoV-2 variants of concern
Source: bioRxiv or medRxiv preprint supplement (doi:10.1101/2021.05.26.21257488), 2021-06-02
Supplement: Supplementary file [file media-1.pdf]

# Clinical validation of colorimetric RT-LAMP, a fast, highly sensitive and specific COVID-19 molecular diagnostic tool that is robust to detect SARS-CoV-2 variants of concern

Pedro A. Alves<sup>1,2\*</sup>, Ellen G. de Oliveira<sup>1</sup>, Ana Paula M. Franco-Luiz<sup>1</sup>, Letícia T. Almeida<sup>1</sup>; Amanda B. Gonçalves<sup>1</sup>, Iara A. Borges<sup>1</sup>, Flávia de S. Rocha<sup>1</sup>; Raissa P. Rocha<sup>2</sup>, Matheus F. Bezerra<sup>3</sup>; Pâmella Miranda<sup>4</sup>; Flávio D. Capanema<sup>5</sup>; Henrique R. Martins<sup>6,7</sup>; Gerald Weber<sup>4</sup>; Santuza M. R. Teixeira<sup>2</sup>, Gabriel Luz Wallau<sup>8</sup>; Rubens L. do Monte-Neto<sup>1\*</sup>

<sup>1</sup>Instituto René Rachou – Fundação Oswaldo Cruz, Belo Horizonte, 30190-009, Minas Gerais, Brasil;

<sup>2</sup>Centro de Tecnologia em Vacinas, Belo Horizonte, 31310-260, Minas Gerais, Brasil

<sup>3</sup>Departamento de Microbiologia, Instituto Aggeu Magalhães – Fundação Oswaldo Cruz, Recife, 50670-420, Pernambuco, Brasil

<sup>4</sup>Departamento de Física, Universidade Federal de Minas Gerais, Belo Horizonte, 31270-901, Minas Gerais, Brasil

<sup>5</sup>Núcleo de Inovação Tecnológica – Fundação Hospitalar do Estado de Minas Gerais, Belo Horizonte, 30150-260, Minas Gerais, Brasil

<sup>6</sup>Visuri Equipamentos e Serviços, Belo Horizonte, Minas Gerais, 31330-070, Minas Gerais Brasil

<sup>7</sup>Departamento de Engenharia Elétrica – Universidade Federal de Minas Gerais, Belo Horizonte, 31270-901, Minas Gerais, Brasil

<sup>8</sup>Departamento de Entomologia e Núcleo de Bioinformática, Instituto Aggeu Magalhães – Fundação Oswaldo Cruz, Recife, 50670-420, Pernambuco, Brasil

\*Corresponding authors: [rubens.monte@fiocruz.br](mailto:rubens.monte@fiocruz.br); [pedro.alves@fiocruz.br](mailto:pedro.alves@fiocruz.br)

## Supplementary material

**Table S1 – SARS-CoV-2-targeting primers showing their melting reference temperatures and coverages.** Some N and E genes-targeting primers presented cross-reactivity with SARS-CoV genomes.

| Primer ID             | T <sub>m</sub> (°C) | Coverage (%) |          |              |
|-----------------------|---------------------|--------------|----------|--------------|
|                       |                     | SARS-CoV-2   | SARS-CoV | non-SARS-CoV |
| SARS-CoV-2 N Set1 B1c | 69.2                | 98.0         | -        | -            |
| SARS-CoV-2 N Set1 B2  | 60.6                | 99.7         | -        | -            |
| SARS-CoV-2 N Set1 B3  | 62.5                | 99.6         | -        | -            |
| SARS-CoV-2 N Set1 F1c | 68.1                | 99.6         | -        | -            |
| SARS-CoV-2 N Set1 F2  | 61.9                | 98.1         | -        | -            |
| SARS-CoV-2 N Set1 F3  | 61.6                | 99.5         | 9        | -            |
| SARS-CoV-2 N Set1 LB  | 64.2                | 99.5         | 9        | -            |
| SARS-CoV-2 N Set1 LF  | 69.3                | 99.7         | -        | -            |
| SARS-CoV-2 N Set2 B1c | 70.1                | 99.8         | -        | -            |
| SARS-CoV-2 N Set2 B2  | 62.9                | 99.6         | -        | -            |

|                          |      |      |    |   |
|--------------------------|------|------|----|---|
| SARS-CoV-2 N Set2 B3     | 64.6 | 99.3 | -  | - |
| SARS-CoV-2 N Set2 F1c    | 69.4 | 99.7 | 10 | - |
| SARS-CoV-2 N Set2 F2     | 62.8 | 97.1 | -  | - |
| SARS-CoV-2 N Set2 F3     | 61.7 | 99.7 | -  | - |
| SARS-CoV-2 N Set2 LB     | 67.6 | 99.7 | 10 | - |
| SARS-CoV-2 N Set2 LF     | 66.4 | 99.6 | 1  | - |
| SARS-CoV-2 E Set1 B1c    | 62.5 | 99.6 | 9  | - |
| SARS-CoV-2 E Set1 B2     | 59.7 | 98.7 | -  | - |
| SARS-CoV-2 E Set1 B3     | 59.5 | 99.7 | 10 | - |
| SARS-CoV-2 E Set1 F1c    | 68.6 | 99.9 | 9  | - |
| SARS-CoV-2 E Set1 F2     | 60.8 | 95.0 | -  | - |
| SARS-CoV-2 E Set1 F3     | 61.3 | 99.6 | -  | - |
| SARS-CoV-2 E Set1 LB     | 70.6 | 99.3 | -  | - |
| SARS-CoV-2 E Set1 LF     | 66.9 | 99.6 | -  | - |
| SARS-CoV-2 RdRp Set1 B1c | 63.4 | 99.6 | -  | - |
| SARS-CoV-2 RdRp Set1 B2  | 64.6 | 99.5 | -  | - |
| SARS-CoV-2 RdRp Set1 B3  | 60.2 | 99.4 | -  | - |
| SARS-CoV-2 RdRp Set1 F1c | 65.7 | 99.9 | -  | - |
| SARS-CoV-2 RdRp Set1 F2  | 56.6 | 99.9 | -  | - |
| SARS-CoV-2 RdRp Set1 F3  | 62.4 | 99.7 | -  | - |
| SARS-CoV-2 RdRp Set1 LB  | 63.8 | 99.3 | -  | - |
| SARS-CoV-2 RdRp Set1 LF  | 60.2 | 99.9 | -  | - |

The RT-LAMP primer sets were aligned to 3364 SARS-CoV-2 genomes and 323 genomes belonging to other coronaviruses being 10 SARS-CoV-related and 313 non-SARS-CoV ones. Melting temperatures were calculated based on mesoscopic model considering up to three mismatches (1). FIP = F1c+F2; BIP = B1c+B2. N: SARS-CoV-2 Nucleocapsid protein coding sequence; E: SARS-CoV-2 Envelope protein coding sequence and RdRp: SARS-CoV-2 RNA-dependent RNA polymerase coding sequence

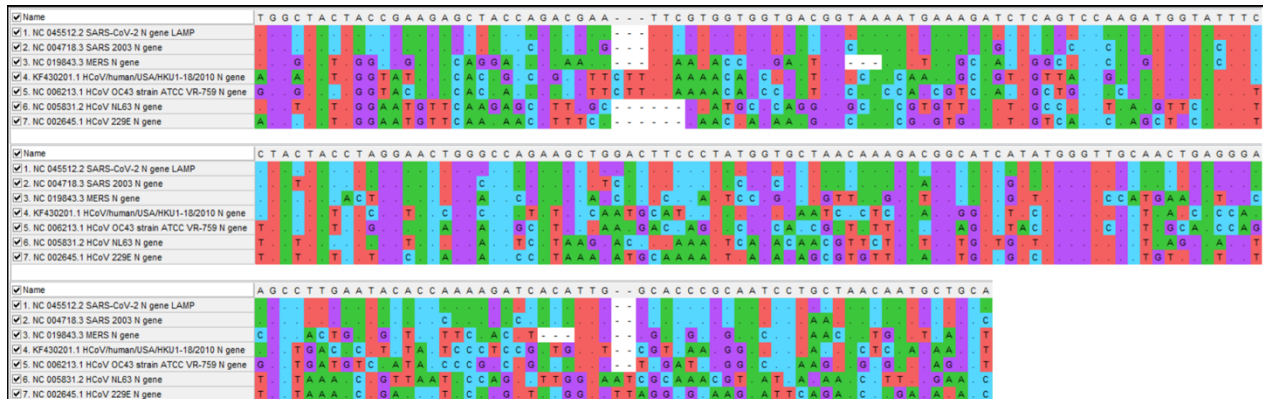

**Figure S1 – Multiple sequence alignment of partial SARS-CoV-2 N gene compared to other human coronaviruses.**

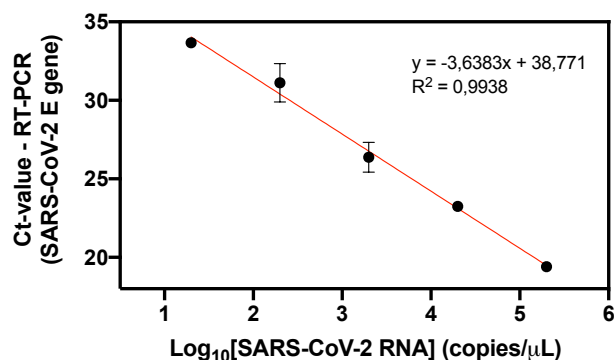

**Figure S2 – Primer efficiency or calibration curve used for analytical sensitivity quantification.** RT-qPCR was performed using SARS-CoV-2 E gene as target (Charité/Berlin protocol) using the SARS-CoV-2 E gene-harboring plasmid ( $2 \times 10^5$  copies/ $\mu$ L) (Biogene COVID-19 PCR, Bioclin/Quibasa #K228-1; Lot: 0007). Linear regression was used to calculate the limit of detection.

**Table S2 – Comparative colorimetric RT-LAMP using two distinct set of primers targeting N gene on low viral load, nasopharyngeal RNA extracted samples.**

| RT-qPCR<br>Ct value (E gene) | RT-qPCR<br>Status | RT-LAMP - SARS-CoV-2 |             |                            |
|------------------------------|-------------------|----------------------|-------------|----------------------------|
|                              |                   | N gene_Set1          | N gene_Set2 | Multiplex N gene_Set1/Set2 |
| 31.85                        | Positive          | Negative             | ND          | Positive                   |
| 32.07                        | Positive          | Positive             | Positive    | Positive                   |
| 32.1                         | Positive          | Negative             | Positive    | Positive                   |
| 32.56                        | Positive          | Negative             | ND          | Positive                   |
| 32.59                        | Positive          | Negative             | Positive    | Positive                   |
| 32.98                        | Positive          | Positive             | Positive    | Positive                   |
| 33.18                        | Positive          | Negative             | ND          | Negative                   |
| 33.35                        | Positive          | Negative             | Positive    | Positive                   |
| 33.6                         | Positive          | Negative             | Positive    | Positive                   |
| 34.31                        | Positive          | Positive             | Positive    | Positive                   |
| 35.2                         | Positive          | Negative             | ND          | Positive                   |
| 36.19                        | Positive          | Positive             | Positive    | Positive                   |

**Table S3 – Clinical SARS-CoV-2 sequenced samples isolated in Pernambuco State, Brazilian Northeast, depicting the lineage or variant identified.**

| Lineage/Variant | Isolated at (City, State)           |
|-----------------|-------------------------------------|
| P.1             | Jaboatão dos Guararapes, Pernambuco |
| P.1             | Recife, Pernambuco                  |
| P.2             | Poção, Pernambuco                   |
| P.2             | Recife, Pernambuco                  |
| B.1.1.374       | Cabo de Santo Agostinho, Pernambuco |
| B.1.1           | Recife, Pernambuco                  |
| B.1.1.28        | Igarassu, Pernambuco                |
| B.1.1.371       | Recife, Pernambuco                  |

SARS-CoV-2 RNA was reversely transcribed into cDNA and sequenced by NGS (Illumina) according to the previous work by (2). Variant of concern/interest monitoring are being currently monitored by Sanger sequencing of specific polymorphic regions, such as Spike-RBD coding portion (K417N/T, E484K, N501Y, A570D) (3). SARS-CoV-2 lineages and variants nomenclature follows the PANGO lineages proposal (<https://cov-lineages.org/>)(4). SARS-CoV-2 variant genomes were deposited on GISAID according to the following accession IDs: EPI\_ISL\_2221860, EPI\_ISL\_2221850, EPI\_ISL\_2221873, EPI\_ISL\_2221890, EPI\_ISL\_2221902, EPI\_ISL\_2221885, EPI\_ISL\_2221844, EPI\_ISL\_2221866

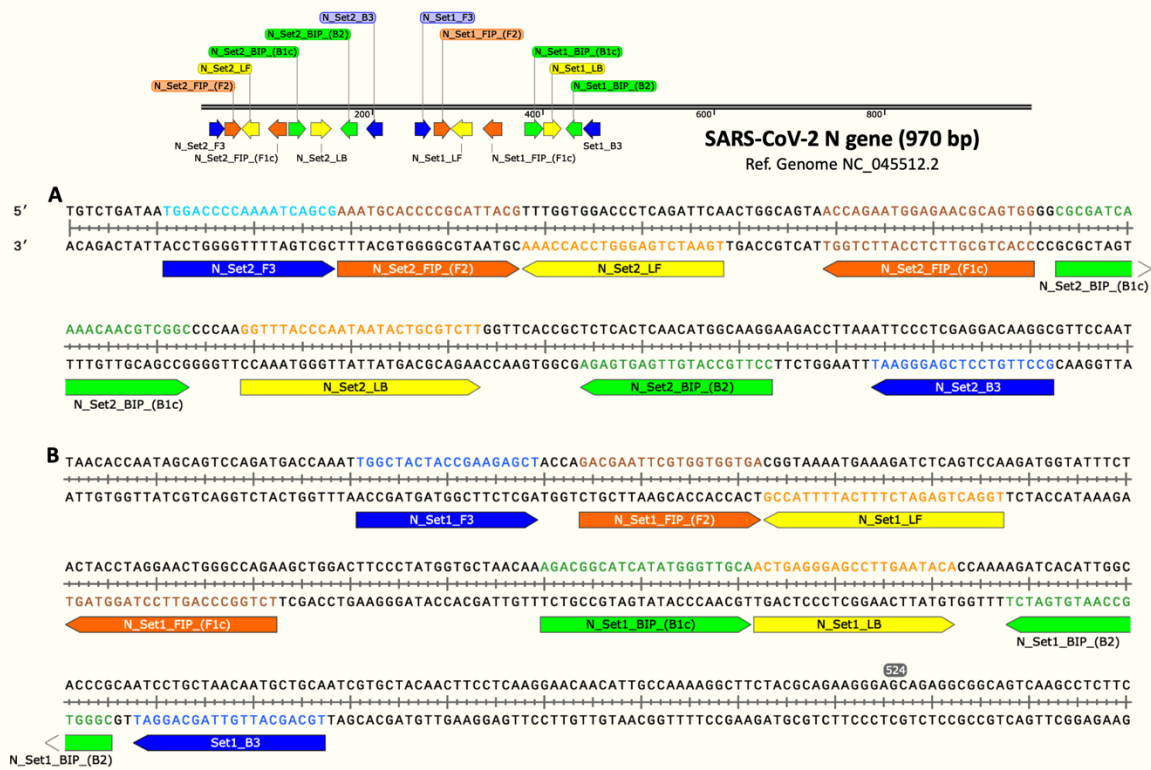

**Figure S3** – SARS-CoV-2 specific N gene set of LAMP primers aligned to their respective target region for Set1 (A) and Set2 (B). The upper scheme represents the zoomed out region on SARS-CoV-2 reference genome NC\_045512.2. Primers were designed using PrimerExplorer V5 or NEB LAMP primer designer softwares. F3/B3: outer primers; FIP/BIP: inner primers and LF/LB: loop primers. Created on SnapGene Viewer

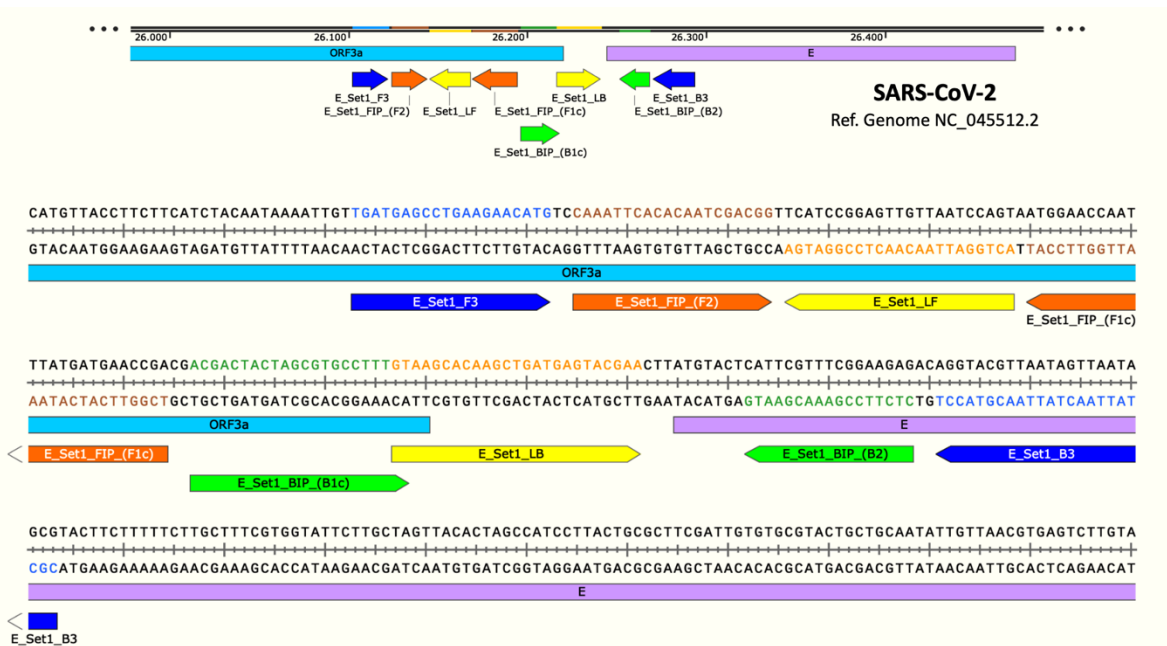

**Figure S4** – SARS-CoV-2 E gene set of LAMP primers aligned to their respective target region, designed based on NC\_045512.2 reference genome. F3/B3: outer primers; FIP/BIP: inner primers and LF/LB: loop primers. E: envelope protein-coding sequence. Created on SnapGene Viewer

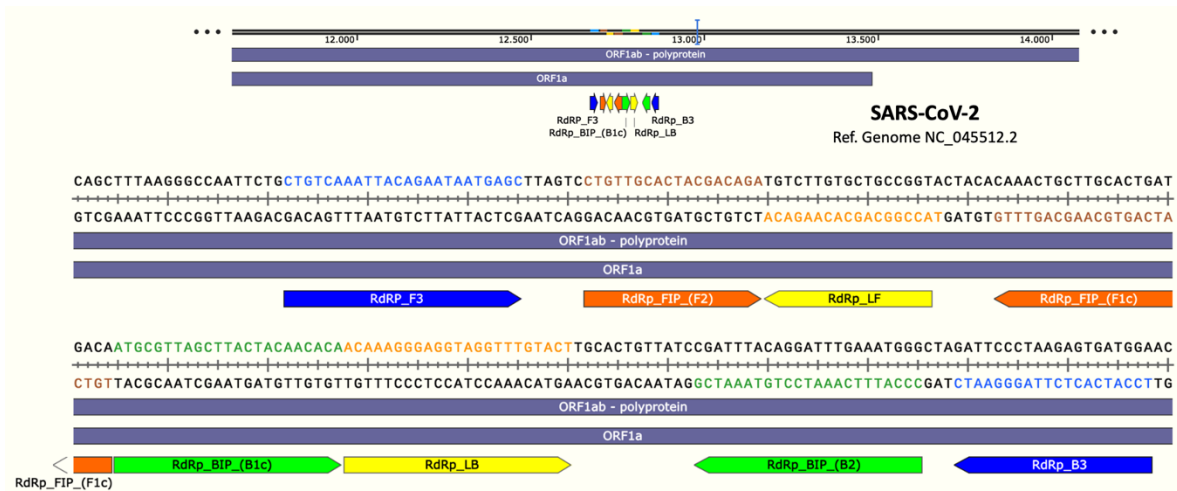

**Figure S5** – SARS-CoV-2 RdRp gene set of LAMP primers aligned to their respective target region, designed based on NC\_045512.2 reference genome. F3/B3: outer primers; FIP/BIP: inner primers and LF/LB: loop primers. RdRp: viral RNA-dependent RNA polymerase-coding sequence. Created on SnapGene Viewer

## References

1. Miranda P, Weber G. 2021. Thermodynamic evaluation of the impact of DNA mismatches in PCR-type SARS-CoV-2 primers and probes. *Molecular and Cellular Probes* 56:101707.
2. Paiva MHS, Guedes DRD, Docena C, Bezerra MF, Dezordi FZ, Machado LC, Krovovsky L, Helvecio E, da Silva AF, Vasconcelos LRS, Rezende AM, da Silva SJR, Sales KG da S, de Sá BSLF, da Cruz DL, Cavalcanti CE, Neto A de M, da Silva CTA, Mendes RPG, da Silva MAL, Gräf T, Resende PC, Bello G, Barros M da S, do Nascimento WRC, Arcoverde RML, Bezerra LCA, Filho SPB, Ayres CFJ, Wallau GL. 2020. Multiple Introductions Followed by Ongoing Community Spread of SARS-CoV-2 at One of the Largest Metropolitan Areas of Northeast Brazil. *Viruses* 12.
3. Bezerra MF, Machado LC, Carvalho V do CV de, Docena C, Brandão-Filho SP, Ayres CFJ, Paiva MHS, Wallau GL. 2021. A Sanger-based approach for scaling up screening of SARS-CoV-2 variants of interest and concern. *medRxiv* 2021.03.20.21253956.
4. Rambaut A, Holmes EC, O'Toole Á, Hill V, McCrone JT, Ruis C, du Plessis L, Pybus OG. 2020. A dynamic nomenclature proposal for SARS-CoV-2 lineages to assist genomic epidemiology. 11. *Nature Microbiology* 5:1403–1407.
